# Supplementary material
Source: PubMed Central journal article supplement (PMC6318291)
Supplement: 41422_2018_122_MOESM1_ESM.pdf [file 41422_2018_122_MOESM1_ESM.pdf]

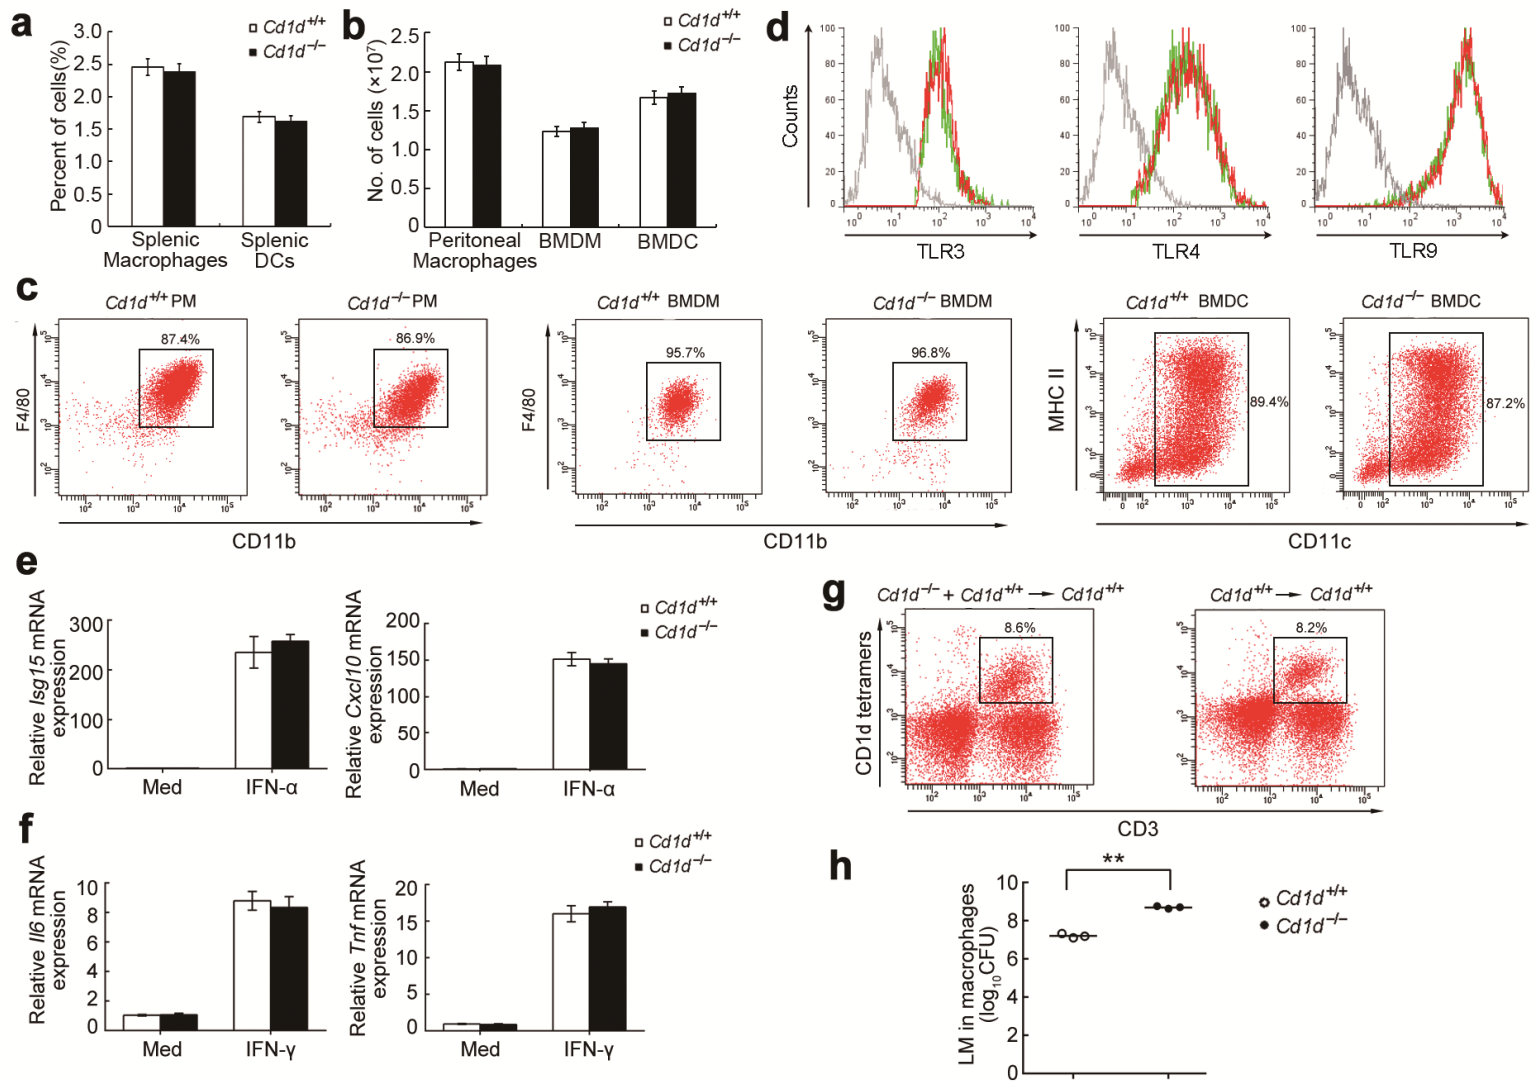

**Supplementary information, Fig. S1** Normal myeloid cell differentiation in CD1d-deficient mice. **a** Flow cytometry analysis of the percentages of macrophages and DCs in splenocytes from  $Cd1d^{+/+}$  or  $Cd1d^{-/-}$  mice. **b** Analysis of absolute numbers of peritoneal macrophages, bone marrow-derived macrophages (BMDM) and bone marrow-derived DCs (BMDC) from  $Cd1d^{+/+}$  or  $Cd1d^{-/-}$  mice. **c** Flow cytometry analysis of expression levels of F4/80 and CD11b in peritoneal macrophages (PM) or BMDM from  $Cd1d^{+/+}$  or  $Cd1d^{-/-}$  mice, and expression levels of MHC II and CD11c in BMDC from  $Cd1d^{+/+}$  or  $Cd1d^{-/-}$  mice. **d** Flow cytometry

analysis of expression levels of TLRs on peritoneal macrophages from *Cd1d*<sup>+/+</sup> or *Cd1d*<sup>-/-</sup> mice (isotype control, light-gray line; *Cd1d*<sup>+/+</sup>, red line; *Cd1d*<sup>-/-</sup>, green line). **e** Q-PCR analysis of *Isg15* or *Cxcl10* mRNA expression in peritoneal macrophages from *Cd1d*<sup>+/+</sup> or *Cd1d*<sup>-/-</sup> mice stimulated with IFN- $\alpha$  (20 ng/ml) for 4 h. **f** Q-PCR analysis of *Il6* or *Tnf* mRNA expression in peritoneal macrophages from *Cd1d*<sup>+/+</sup> or *Cd1d*<sup>-/-</sup> mice stimulated with IFN- $\gamma$  (20 ng/ml) for 4 h. **g** Lethally irradiated wild type mice were reconstituted with a 1:1 mixture of bone marrow cells from *Cd1d*<sup>+/+</sup> and *Cd1d*<sup>-/-</sup> mice or with bone marrow cells from *Cd1d*<sup>+/+</sup> mice alone. Eight weeks later, hepatic NKT cells were separated and analyzed by flow cytometry with CD1d tetramers and CD3 antibody. **h** Bacteria loads in peritoneal macrophages from *Cd1d*<sup>+/+</sup> or *Cd1d*<sup>-/-</sup> mice 12 h after infection of *Listeria monocytogenes* (MOI = 1). Data are from three independent experiments (**a**, **b**, **e**, **f**, **h**; mean  $\pm$  SEM) or are representative of three independent experiments (**c**, **d**, **g**). \*\* $P < 0.01$  (Student's *t*-test). LM, *Listeria monocytogenes*.
