# Supplementary material
Source: PubMed Central journal article supplement (PMC6318291)
Supplement: 41422_2018_122_MOESM4_ESM.pdf [file 41422_2018_122_MOESM4_ESM.pdf]

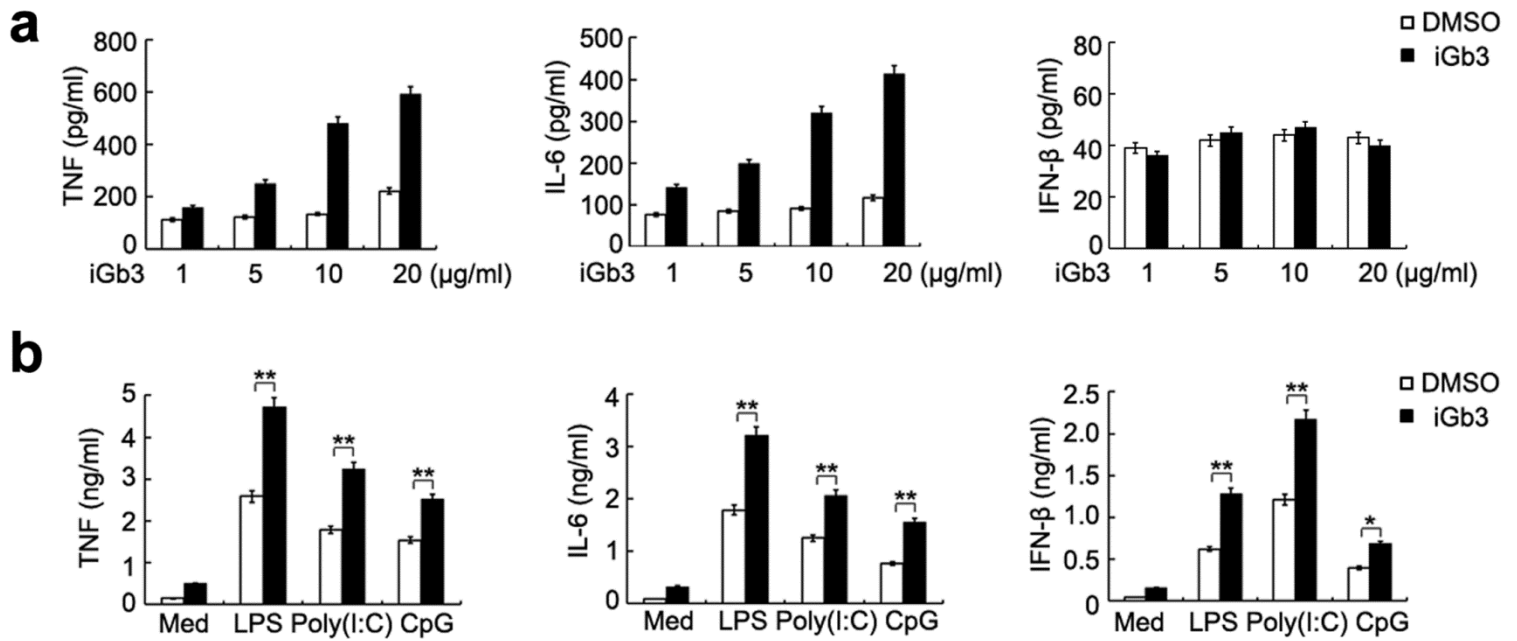

**Supplementary information, Fig. S4** Glycolipid iGb3 promotes cytokines production in macrophages. **a** ELISA of TNF, IL-6 and IFN- $\beta$  in supernatants of peritoneal macrophages stimulated with the indicated concentrations of iGb3 for 6 h. **b** ELISA of TNF, IL-6 and IFN- $\beta$  in supernatants of macrophages pretreated with iGb3 (10  $\mu$ g/ml) for 15 min and then stimulated with LPS, Poly(I:C) or CpG for 6 h. Data are shown as mean  $\pm$  SEM and from three independent experiments. \* $P < 0.05$ ; \*\* $P < 0.01$  (Student's  $t$ -test).
