# Supplementary material
Source: PubMed Central journal article supplement (PMC6318291)
Supplement: 41422_2018_122_MOESM7_ESM.pdf [file 41422_2018_122_MOESM7_ESM.pdf]

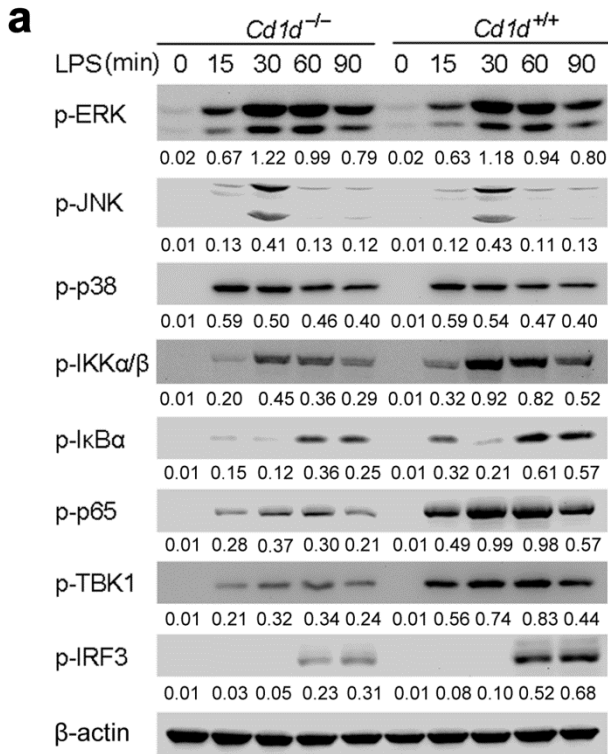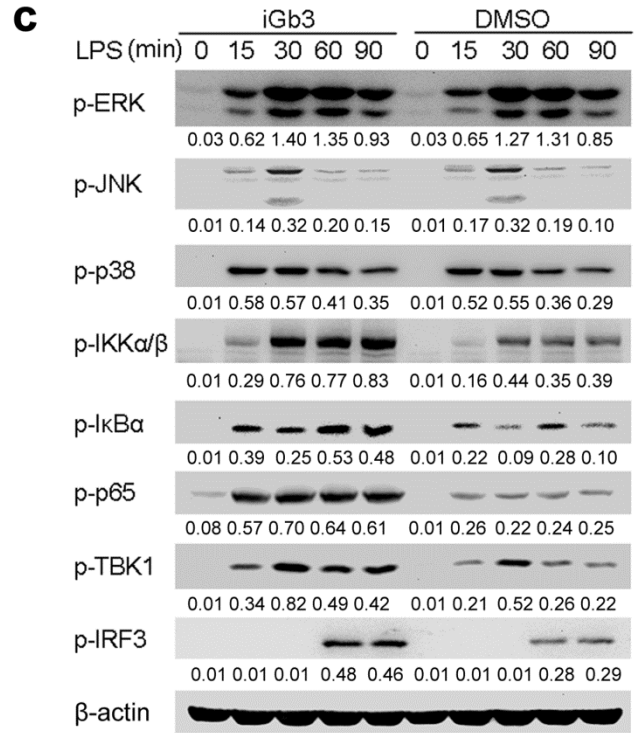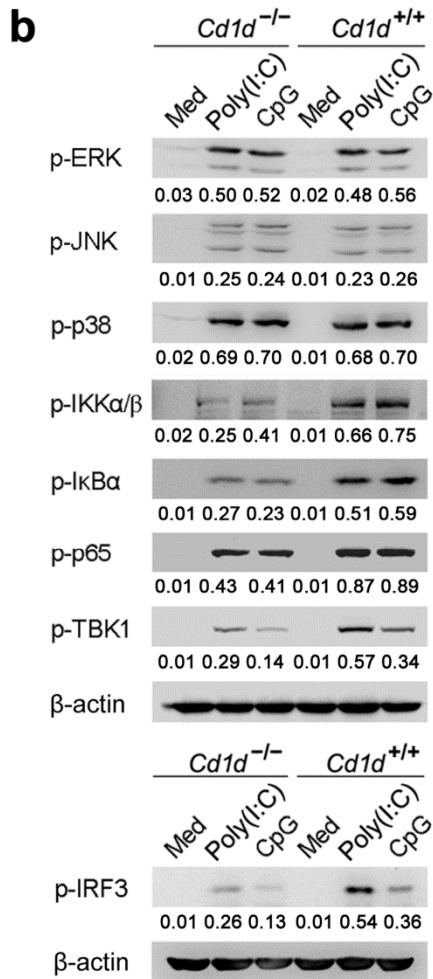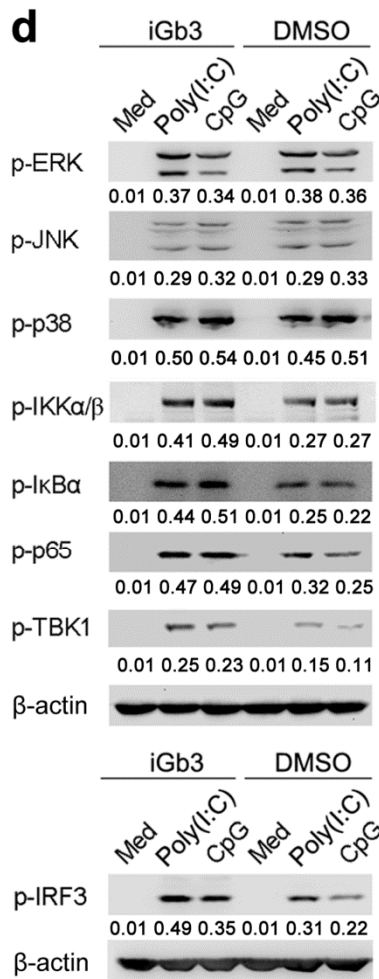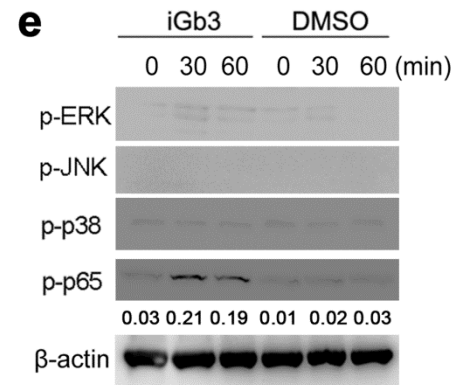

**Supplementary information, Fig. S7** CD1d reverse signaling promotes the activation of TLR signaling in macrophages. **a** Immunoblot analysis of phosphorylated (p-) signaling molecules in lysates of *Cd1d*<sup>+/+</sup> and *Cd1d*<sup>-/-</sup> macrophages stimulated with LPS for the indicated times. **b** Immunoblot analysis of phosphorylated (p-) ERK, JNK, p38, IKK $\alpha/\beta$ , I $\kappa$ B $\alpha$ , p65 and TBK1 in lysates of *Cd1d*<sup>+/+</sup> and *Cd1d*<sup>-/-</sup> macrophages stimulated with Poly(I:C) or CpG ODN for 30 min, or phosphorylated IRF3 in lysates of *Cd1d*<sup>+/+</sup> and *Cd1d*<sup>-/-</sup> macrophages stimulated with Poly(I:C) or CpG ODN for 60 min. **c** Immunoblot analysis of phosphorylated signaling molecules in lysates of macrophages pretreated with iGb3 and then stimulated with LPS for the indicated times. **d** Immunoblot analysis of phosphorylated (p-) ERK, JNK, p38, IKK $\alpha/\beta$ , I $\kappa$ B $\alpha$ , p65 and TBK1 in lysates of macrophages pretreated with iGb3 and then stimulated with Poly(I:C) or CpG ODN for 30 min, or phosphorylated IRF3 in lysates of macrophages pretreated with iGb3 and then stimulated with Poly(I:C) or CpG ODN for 60 min. **e** Immunoblot analysis of phosphorylated (p-) ERK, JNK, p38 and p65 in lysates of macrophages stimulated with iGb3 for the indicated times. Data are representative of three independent experiments.
