# Supplementary material
Source: PubMed Central journal article supplement (PMC6318291)
Supplement: 41422_2018_122_MOESM8_ESM.pdf [file 41422_2018_122_MOESM8_ESM.pdf]

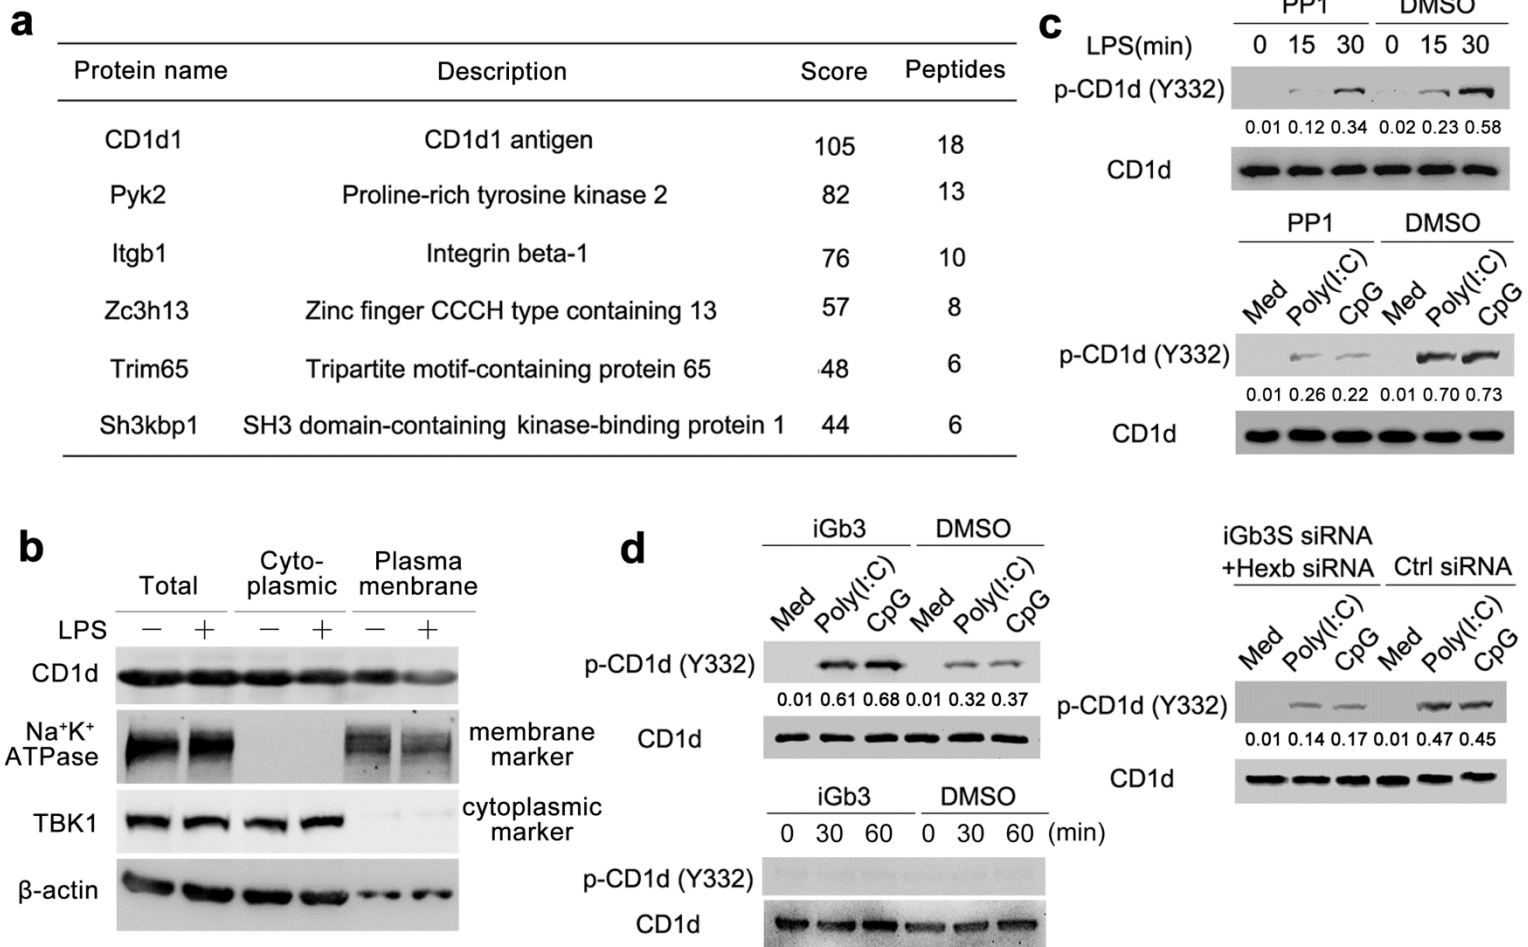

**Supplementary information, Fig. S8** Intracellular CD1d interacts with Pyk2 and iGb3 promotes TLR-induced CD1d phosphorylation. **a** Identification of CD1d interacting proteins by reverse-phase nanospray liquid chromatography-tandem mass spectrometry after immunoprecipitating CD1d from lysates of LPS-stimulated macrophages. **b** Immunoblot analysis of CD1d, Na<sup>+</sup>K<sup>+</sup> ATPase, TBK1 and β-actin from total, cytoplasmic or plasma membrane protein in lysates of macrophages stimulated with LPS or left untreated. **c** Immunoblot analysis of CD1d phosphorylated at Y332 or total CD1d in lysates of peritoneal macrophages pretreated with PP1 and

stimulated with LPS for the indicated times or Poly(I:C) and CpG ODN for 30 min. **d** Immunoblot analysis of CD1d phosphorylated at Y332 or total CD1d in lysates from macrophages pre-treated with iGb3 (left up) or from macrophages transfected with control siRNA or iGb3S plus Hexb siRNA (right up), followed by stimulation with Poly(I:C) or CpG ODN for 30 min, or from macrophages stimulated with iGb3 for the indicated times (bottom). Data are representative of three independent experiments.
