# Supplementary material
Source: PubMed Central journal article supplement (PMC6318291)
Supplement: 41422_2018_122_MOESM9_ESM.pdf [file 41422_2018_122_MOESM9_ESM.pdf]

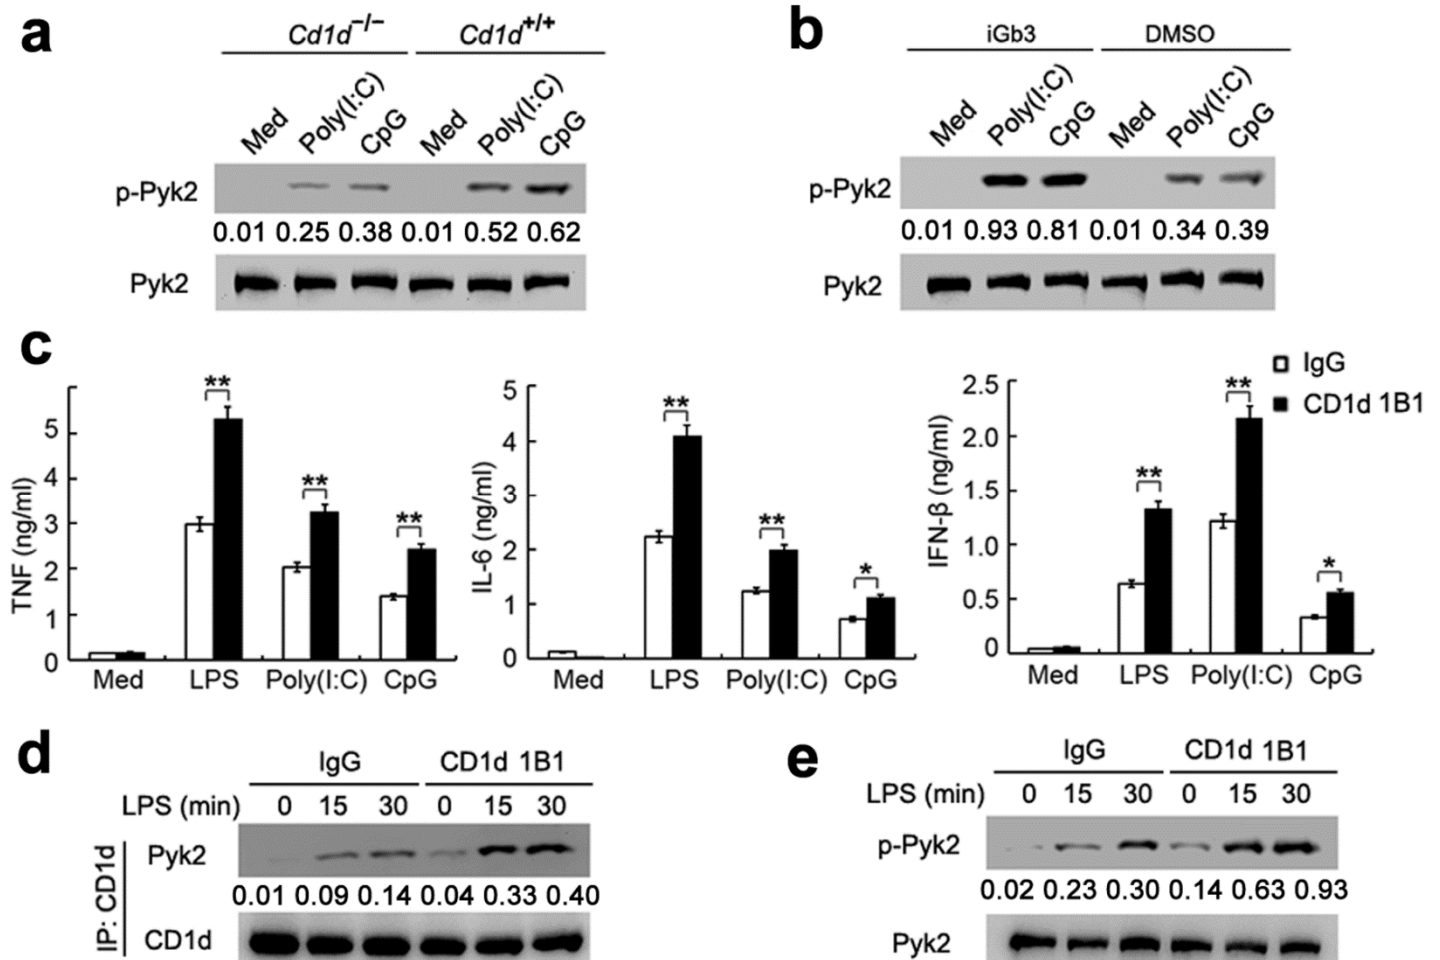

**Supplementary information, Fig. S9** CD1d reverse signaling promotes Pyk2 phosphorylation. **a** Immunoblot analysis of phosphorylated and total Pyk2 in lysates of *Cd1d*<sup>+/+</sup> and *Cd1d*<sup>-/-</sup> macrophages stimulated with Poly(I:C) or CpG ODN for 30 min. **b** Immunoblot analysis of phosphorylated and total Pyk2 in lysates of macrophages pretreated with iGb3 and then stimulated with Poly(I:C) or CpG ODN for 30 min. **c** ELISA of cytokines in supernatants of macrophages after ligation with control IgG or CD1d mAb 1B1 and then stimulated with LPS, Poly(I:C) or CpG ODN for 6 h. **d** Immunoblot analysis of Pyk2 and CD1d immunoprecipitated with CD1d Ab

in lysates of macrophages after ligation with control IgG or CD1d mAb 1B1 and then stimulated with LPS for the indicated times. **e** Immunoblot analysis of phosphorylated and total Pyk2 in lysates of macrophages after ligation with control IgG or CD1d mAb 1B1 and then stimulated with LPS for the indicated times. Data are representative of three independent experiments (**a**, **b**, **d** and **e**), or are from three independent experiments (**c**, mean  $\pm$  SEM). \* $P$  < 0.05; \*\* $P$  < 0.01 (Student's t-test).
