# Supplementary material
Source: PubMed Central journal article supplement (PMC6318291)
Supplement: 41422_2018_122_MOESM10_ESM.pdf [file 41422_2018_122_MOESM10_ESM.pdf]

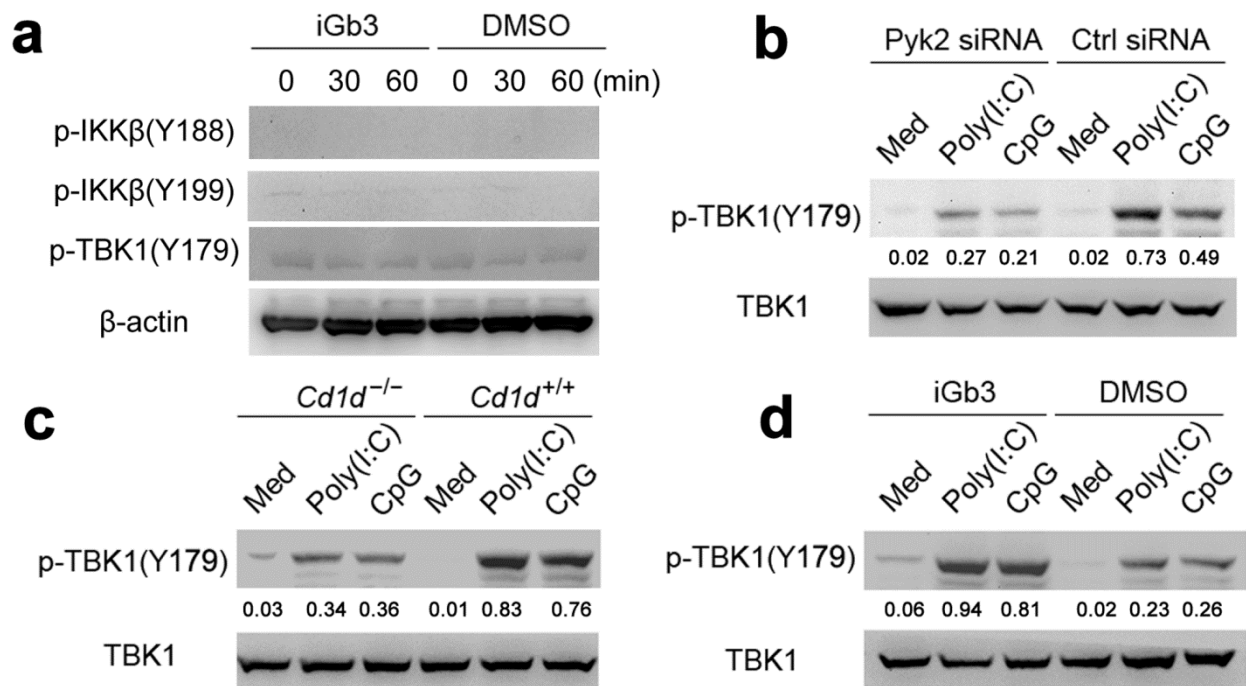

**Supplementary information, Fig. S10** CD1d reverse signaling promotes TLR-induced TBK1 phosphorylation at Y179. **a** Immunoblot analysis of p-IKKβ (Y188), p-IKKβ (Y199) or p-TBK1 (Y179) in lysates from macrophages stimulated with iGb3 for the indicated times. **b** Immunoblot analysis of p-TBK1 (Y179) or total TBK1 in lysates from macrophages transfected with control siRNA or Pyk2 siRNA, and then stimulated with Poly(I:C) or CpG for 30 min. **c** Immunoblot analysis of p-TBK1 (Y179) or total TBK1 in lysates from *Cd1d*<sup>+/+</sup> and *Cd1d*<sup>-/-</sup> macrophages stimulated with Poly(I:C) or CpG for 30 min. **d** Immunoblot analysis of p-TBK1 (Y179) or total TBK1 in lysates from macrophages pre-treated with iGb3, followed by stimulation with Poly(I:C) or CpG for 30 min. Data are representative of three independent experiments.
