# Supplementary material
Source: PubMed Central journal article supplement (PMC6318291)
Supplement: 41422_2018_122_MOESM13_ESM.pdf [file 41422_2018_122_MOESM13_ESM.pdf]

**Supplementary information, Table S2** Relative abundance of major GSLs identified in mouse macrophages.

| GSL               | macrophages left untreated        |            |              |              | GSL               | macrophages stimulated with LPS for 3h |            |              |              |
|-------------------|-----------------------------------|------------|--------------|--------------|-------------------|----------------------------------------|------------|--------------|--------------|
|                   | Molecular ions[M+Na] <sup>+</sup> | Fatty Acid | Sphingo sine | Total GSL(%) |                   | Molecular ions[M+Na] <sup>+</sup>      | Fatty Acid | Sphingo sine | Total GSL(%) |
| GlcCer            | 806.83                            | 16:0       | d18:1        | 21.13%       | GlcCer            | 806.83                                 | 16:0       | d18:1        | 25.25%       |
|                   | 862.92                            | 20:0       | d18:1        |              |                   | 862.92                                 | 20:0       | d18:1        |              |
|                   | 891.00                            | 22:0       | d18:1        |              |                   | 890.92                                 | 22:0       | d18:1        |              |
|                   | 892.67                            | 22:0       | d18:0        |              |                   | 892.58                                 | 22:0       | d18:0        |              |
|                   | 917.00                            | 24:1       | d18:1        |              |                   | 917.00                                 | 24:1       | d18:1        |              |
|                   | 919.00                            | 24:0       | d18:1        |              |                   | 919.00                                 | 24:0       | d18:1        |              |
|                   | 949.00                            | h24:0      | d18:1        |              |                   | 949.00                                 | h24:0      | d18:1        |              |
|                   | 951.17                            | h22:0      | t18:0        |              |                   | 951.25                                 | h22:0      | t18:0        |              |
| LacCer            | 1011.00                           | 16:0       | d18:1        | 27.82%       | LacCer            | 1010.92                                | 16:0       | d18:1        | 28.22%       |
|                   | 1039.83                           | h16:0      | d18:1        |              |                   | 1039.00                                | h16:0      | d18:1        |              |
|                   | 1067.00                           | 20:0       | d18:1        |              |                   | 1067.00                                | 20:0       | d18:1        |              |
|                   | 1095.08                           | 22:0       | d18:1        |              |                   | 1095.00                                | 22:0       | d18:1        |              |
|                   | 1121.08                           | 24:0       | d18:2        |              |                   | 1121.00                                | 24:0       | d18:2        |              |
|                   | 1123.08                           | 24:0       | d18:1        |              |                   | 1123.08                                | 24:0       | d18:1        |              |
| Gb3/iGb3          | 1215.83                           | 16:0       | d18:1        | 1.41%        | Gb3/iGb3          | 1215.00                                | 16:0       | d18:1        | 2.26%        |
|                   | 1243.67                           | 18:00      | d18:1        |              |                   | 1243.17                                | 18:0       | d18:1        |              |
|                   | 1271.42                           | 20:0       | d18:1        |              |                   | 1271.00                                | 20:0       | d18:1        |              |
|                   | 1300.08                           | 22:0       | d18:1        |              |                   | 1300.00                                | 22:0       | d18:1        |              |
|                   | 1326.08                           | 24:0       | d18:1        |              |                   | 1326.00                                | 24:0       | d18:1        |              |
|                   | 1355.20                           | 26:0       | d18:1        |              |                   | 1355.25                                | 26:0       | d18:1        |              |
| Lc3               | 1256.00                           | 16:0       | d18:1        | 10.42%       | Lc3               | 1256.00                                | 16:0       | d18:1        | 8.97%        |
|                   | 1286.08                           | h16:0      | d18:1        |              |                   | 1286.00                                | h16:0      | d18:1        |              |
|                   | 1340.17                           | 22:0       | d18:1        |              |                   | 1340.17                                | 22:0       | d18:1        |              |
|                   | 1366.08                           | 24:1       | d18:1        |              |                   | 1366.17                                | 24:1       | d18:1        |              |
|                   | 1368.17                           | 24:0       | d18:1        |              |                   | 1368.08                                | 24:0       | d18:1        |              |
|                   | 1396.08                           | 26:0       | d18:1        |              |                   | 1396.17                                | 26:0       | d18:1        |              |
| Gb4/iGb4/<br>nLc4 | 1460.17                           | 16:0       | d18:1        | 39.21%       | Gb4/iGb4/<br>nLc4 | 1460.17                                | 16:0       | d18:1        | 35.30%       |
|                   | 1490.17                           | h16:0      | d18:1        |              |                   | 1490.17                                | h16:0      | d18:1        |              |
|                   | 1544.25                           | 22:0       | d18:1        |              |                   | 1544.17                                | 22:0       | d18:1        |              |
|                   | 1570.25                           | 24:1       | d18:1        |              |                   | 1570.25                                | 24:1       | d18:1        |              |
|                   | 1572.25                           | 24:0       | d18:1        |              |                   | 1572.25                                | 24:0       | d18:1        |              |
|                   | 1600.25                           | 26:0       | d18:1        |              |                   | 1600.25                                | 26:0       | d18:1        |              |

For fatty acid, the number before the colon refers to the length of carbon chain, and the number after

the colon stands for the total amount of double bonds. For sphingosine, the number before the colon refers to the length of carbon chain, and the number after the colon shows the total amount of double bonds. 'd' represents dihydroxyl.
